# Supplementary material for: Prognostic and therapeutic insights into MIF, DDT, and CD74 in melanoma
Source: PubMed Central journal article supplement (PMC11259151; doi:10.18632/oncotarget.28615), 2024-07-19
Supplement: oncotarget-15-28615-s001.pdf [file oncotarget-15-28615-s001.pdf]

# Prognostic and therapeutic insights into MIF, DDT, and CD74 in melanoma

## SUPPLEMENTARY MATERIALS

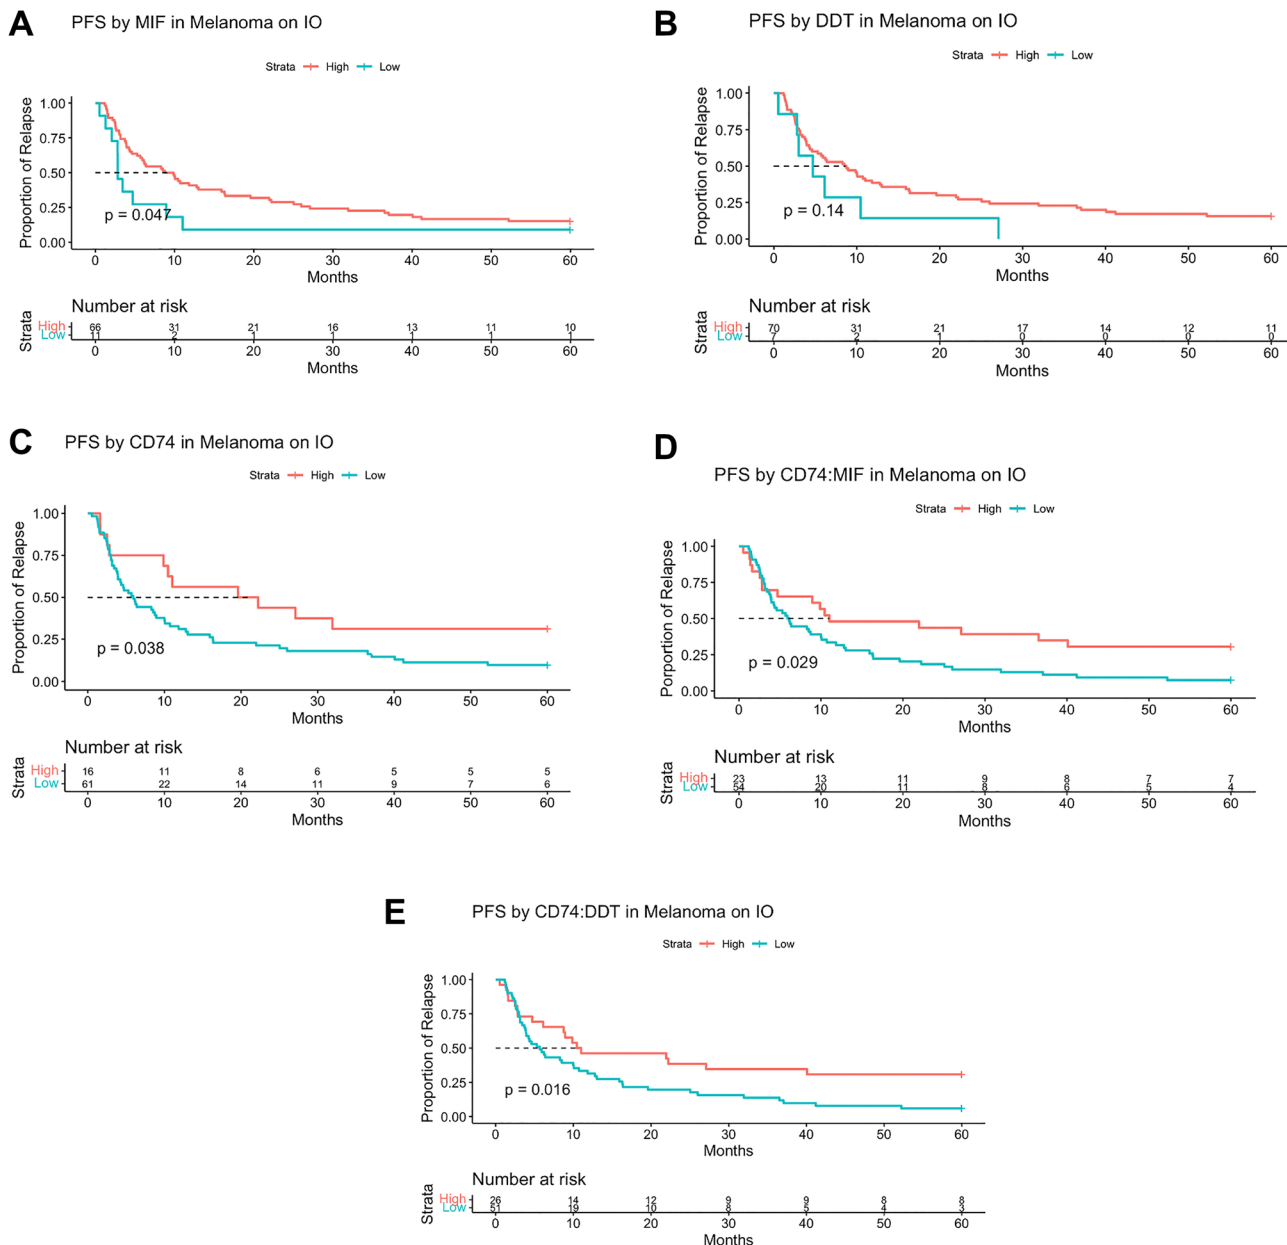

**Supplementary Figure 1: PFS analyzed according to MIF, DDT, and CD74 using the PFS-derived surv\_cutpoint approach in Rstudio.** Elevated MIF (A), DDT (B), and CD74 (C) levels are associated with improved PFS (MIF  $p = 0.047$ , DDT  $p = 0.14$ , CD74  $p = 0.038$ ). (D, E) Elevated CD74:MIF and CD74:DDT levels are also associated with improved PFS (CD74:MIF  $p = 0.029$ , CD74:DDT  $p = 0.016$ ). Number at risk refers to the quantity of eligible patients alive at each time point. IO = Immunotherapy.

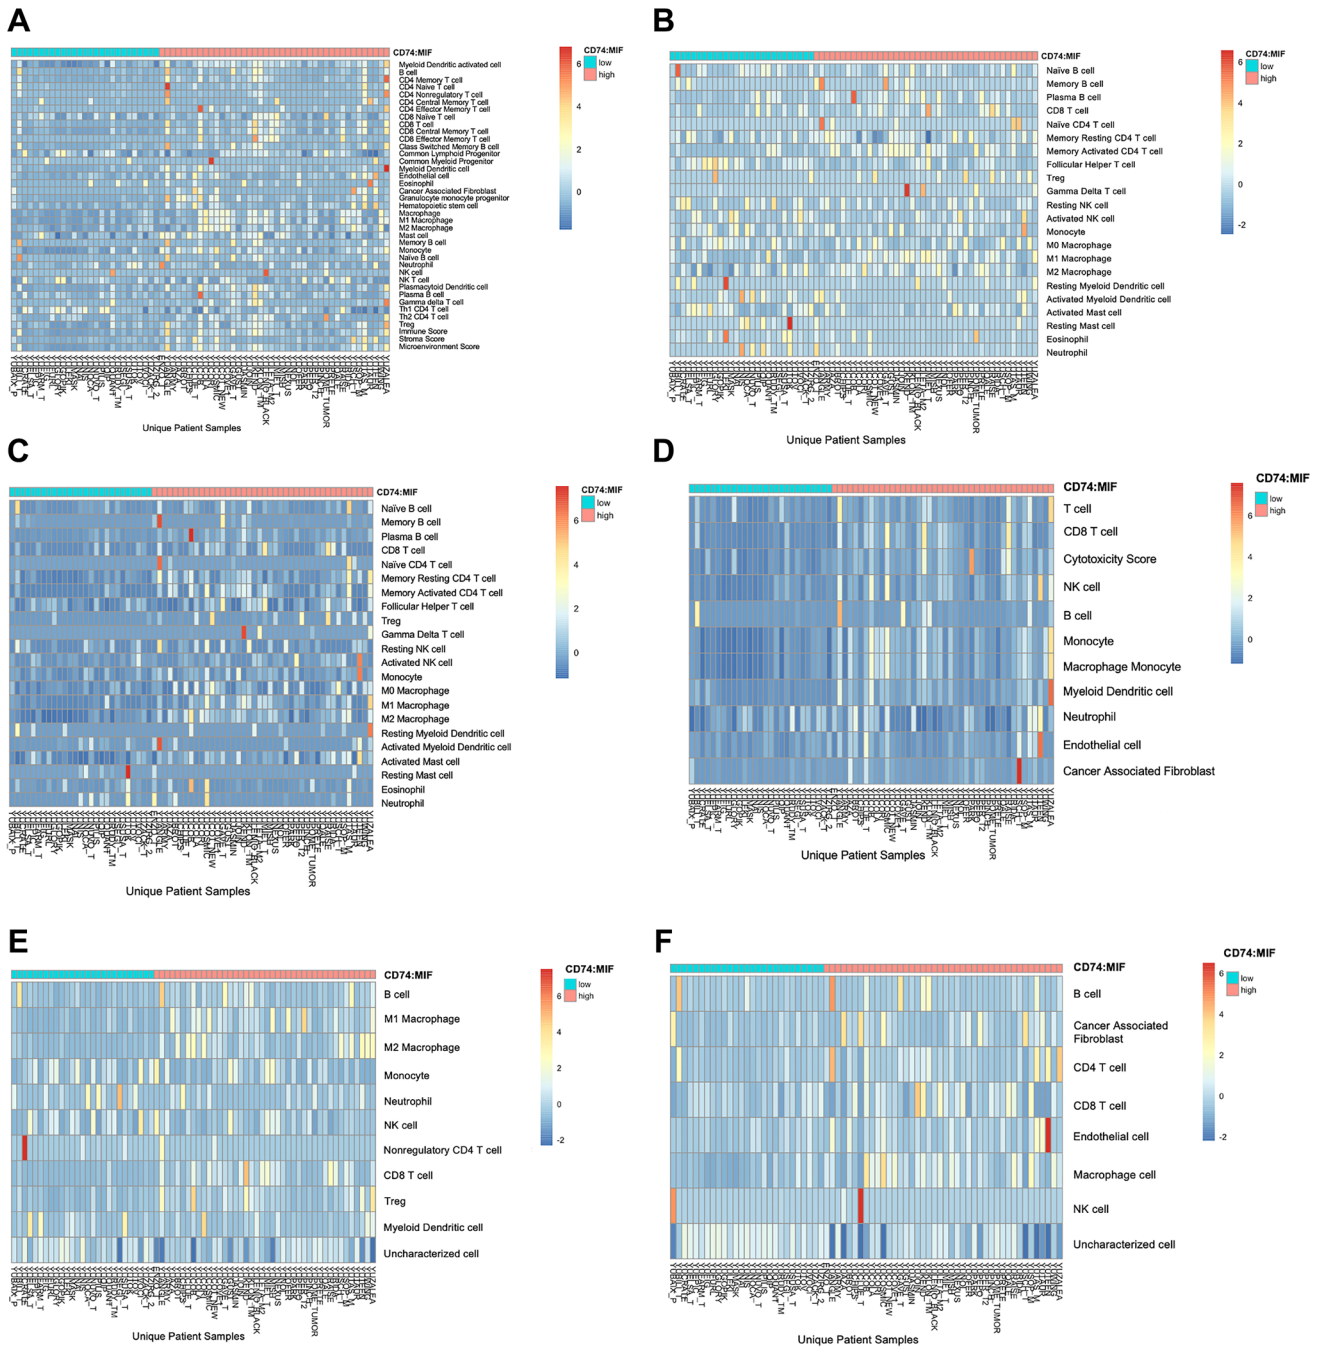

**Supplementary Figure 2:** An enrichment of intratumoral immune cells are present in high CD74:MIF groups when compared with low cohorts as seen with (A) XCELL, (B) CIBERSORT, (C) CIBERSORT abs.mode, (D) MCP\_Counter, (E) quantIseq, and (F) EPIC deconvolution algorithms. Cutoff for high and low values was determined using the OS-derived surv\_cutpoint approach on Rstudio.

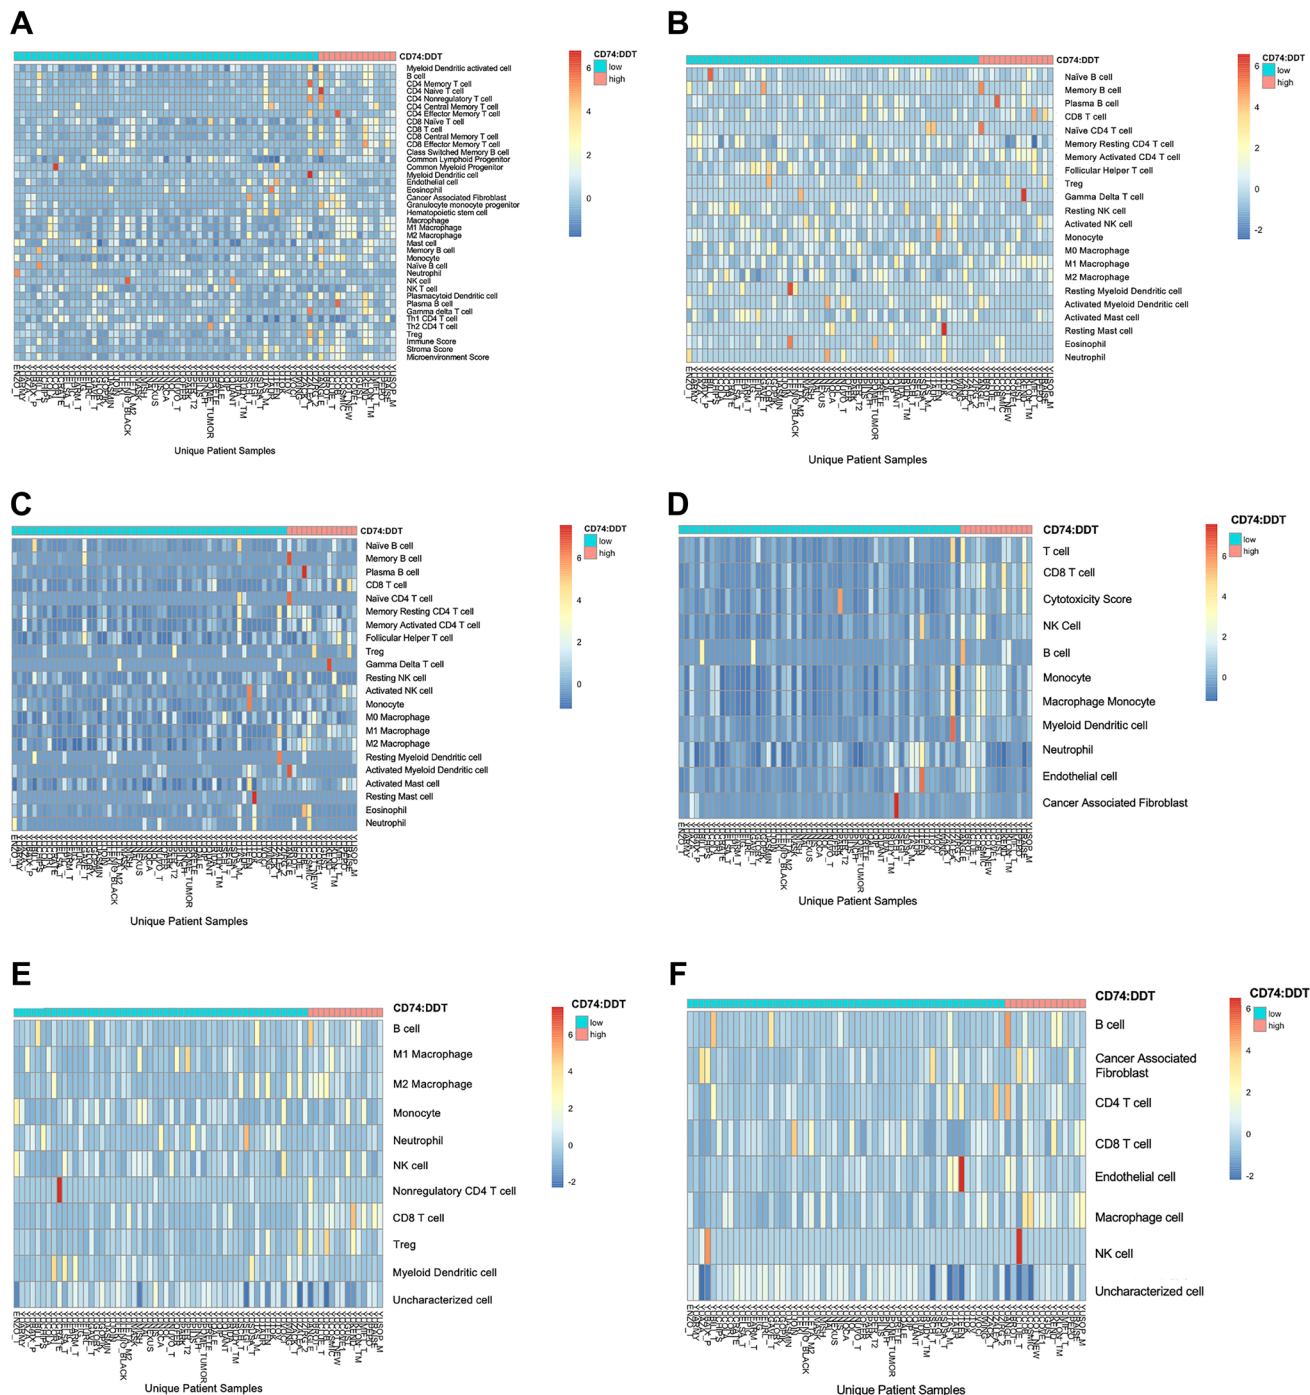

**Supplementary Figure 3:** An enrichment of intratumoral immune cells are present in high CD74:DDT groups when compared with low cohorts as seen with (A) XCELL, (B) CIBERSORT, (C) CIBERSORT abs.mode, (D) MCP\_Counter, (E) quantIseq, and (F) EPIC deconvolution algorithms. Cutoff for high and low values was determined using the OS-derived surv\_cutpoint approach on Rstudio.

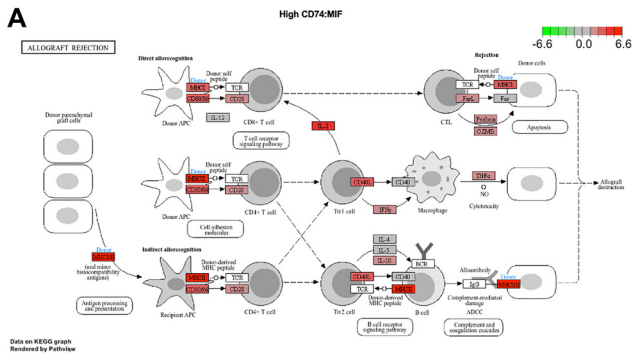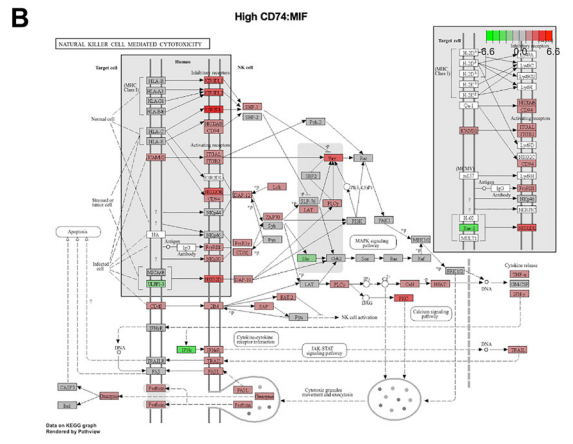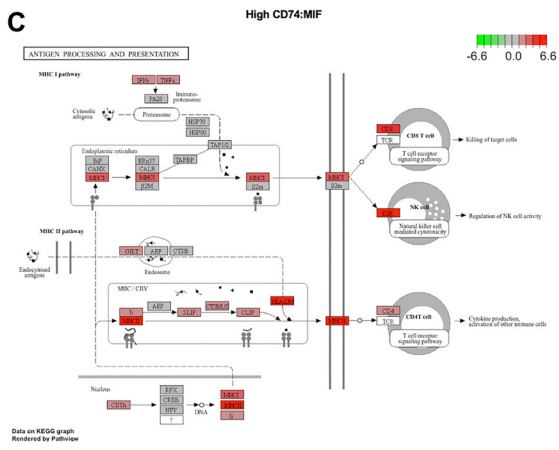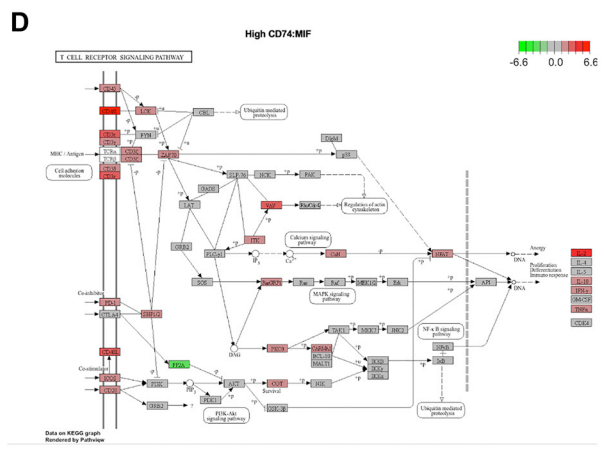

**Supplementary Figure 4:** Pathway analysis of differentially expressed genes in high CD74:MIF groups according to Kyoto Encyclopedia of Genes and Genomes (KEGG) Pathway Sets reveals an upregulation of immune related pathways involved in (A) Allograft Rejection, (B) Natural Killer Cell Mediated Toxicity, (C) Antigen Processing and Presentation, and (D) T cell Receptor Signaling. Upregulated genes are represented in red and downregulated genes are represented in green.







**Supplementary Table 1: A list of shared differentially expressed genes (DEGs) between high CD74:MIF and high CD74:DDT cohorts after filtering for DEGs with a padj < -0.05 and an absolute Log2FoldChange > 1.5**

|          | CD74 MIF Log2FoldChange | CD74 DDT Log2FoldChange |
|----------|-------------------------|-------------------------|
| PIM2     | 1.592                   | 1.991                   |
| APOL4    | 1.788                   | 1.768                   |
| CD3E     | 2.645                   | 2.235                   |
| ZNF80    | 2.274                   | 2.587                   |
| LAG3     | 2.052                   | 1.975                   |
| IDO1     | 2.822                   | 2.653                   |
| HGF      | 1.769                   | 2.348                   |
| CD2      | 2.405                   | 2.067                   |
| HLA-DOA  | 2.173                   | 1.926                   |
| CD8A     | 2.367                   | 2.002                   |
| HLA-DPB1 | 1.751                   | 1.525                   |
| CD7      | 1.922                   | 1.889                   |
| P2RX1    | 2.129                   | 2.183                   |
| LAX1     | 2.278                   | 2.289                   |
| SMOC2    | 1.811                   | 2.051                   |
| SLA2     | 1.957                   | 1.863                   |
| CD8B     | 2.182                   | 2.214                   |
| CD27     | 2.394                   | 2.109                   |
| PDZRN4   | 3.981                   | 3.100                   |
| GBP5     | 2.431                   | 2.131                   |
| RHOU     | 1.594                   | 1.726                   |
| FCER1G   | 2.286                   | 1.656                   |
| MZB1     | 2.459                   | 2.579                   |
| HLA-DQB1 | 1.707                   | 1.649                   |
| FASLG    | 2.484                   | 2.069                   |
| CD38     | 2.358                   | 2.085                   |
| XCR1     | 2.622                   | 2.363                   |
| IL2RB    | 1.993                   | 1.634                   |
| CTSW     | 2.087                   | 1.829                   |
| IGLL5    | 4.042                   | 3.047                   |
| KCNA3    | 2.396                   | 2.118                   |
| TIGIT    | 1.748                   | 1.732                   |
| PTGER4   | 1.627                   | 1.584                   |
| ACKR1    | 2.612                   | 2.335                   |
| IL2RG    | 2.246                   | 1.684                   |
| LRRC4C   | 2.099                   | 2.378                   |
| RCSD1    | 1.843                   | 1.535                   |
| JCHAIN   | 3.020                   | 2.594                   |
| CXCR3    | 2.123                   | 1.769                   |
| ACOXL    | 2.264                   | 2.544                   |
| P2RY8    | 2.061                   | 1.630                   |
| ITGAL    | 2.311                   | 1.646                   |
| PLAGL1   | 1.540                   | 1.663                   |
| LAMP3    | 2.727                   | 2.148                   |
| ETV7     | 2.031                   | 1.761                   |
| TBX21    | 2.320                   | 1.751                   |
| SPAG6    | 2.838                   | 3.278                   |
| STAT4    | 1.542                   | 1.543                   |
| PTPN22   | 1.797                   | 1.564                   |
| CXCL9    | 2.699                   | 2.241                   |
| ZBP1     | 2.198                   | 2.003                   |
| LCK      | 1.769                   | 1.725                   |
| CCL5     | 1.661                   | 1.528                   |
| ACAP1    | 1.731                   | 1.681                   |
| NUGGC    | 2.923                   | 2.621                   |
| CD3G     | 2.140                   | 1.797                   |
| INMT     | 1.582                   | 1.901                   |
| SLC38A11 | 1.706                   | 2.421                   |
| NCMAP    | 2.852                   | 3.354                   |
| TTC16    | 1.979                   | 1.833                   |
| SLFN12L  | 1.967                   | 1.806                   |
| C1QTNF3  | 2.094                   | 1.878                   |

|          |        |        |
|----------|--------|--------|
| JSRP1    | 1.818  | 2.135  |
| C16orf54 | 1.834  | 1.614  |
| TSHR     | 1.662  | 1.909  |
| AKAP5    | 1.973  | 1.822  |
| CXCR6    | 2.161  | 1.860  |
| BLNK     | 1.602  | 1.504  |
| FCGBP    | 1.756  | 2.092  |
| LTB      | 2.538  | 2.069  |
| CYSLTR1  | 1.667  | 1.616  |
| CDCP1    | 1.822  | 1.611  |
| SLC27A2  | 1.736  | 1.897  |
| SFRP4    | 3.533  | 2.470  |
| IKZF3    | 2.143  | 1.855  |
| CCL14    | 3.125  | 2.102  |
| PIK3CG   | 1.915  | 1.530  |
| CXCL11   | 2.077  | 2.038  |
| UBASH3A  | 2.311  | 2.022  |
| GRIN3A   | 1.853  | 1.825  |
| SIX2     | 1.672  | 2.314  |
| CARMIL2  | 1.829  | 1.698  |
| SLITRK4  | 2.375  | 1.899  |
| CCR2     | 2.298  | 1.667  |
| NLRC3    | 1.882  | 1.653  |
| TRAF3IP3 | 1.889  | 1.726  |
| SYT15    | 3.423  | 2.716  |
| NAIP     | 2.064  | 1.664  |
| CD5      | 2.307  | 1.872  |
| LIFR     | 1.650  | 2.010  |
| CD1B     | 3.324  | 2.773  |
| VPREB3   | 2.892  | 2.822  |
| TACR1    | 3.095  | 2.572  |
| POU2AF1  | 2.491  | 2.146  |
| SIT1.00  | 1.678  | 1.610  |
| BHLHA15  | 1.644  | 2.143  |
| SIRPG    | 2.631  | 1.881  |
| PAPPA2   | 1.556  | 2.277  |
| THEMIS   | 1.982  | 1.761  |
| CD96     | 2.024  | 1.592  |
| PLCXD3   | 2.756  | 2.886  |
| NKG7     | 1.965  | 1.579  |
| CD247    | 1.747  | 1.522  |
| ACE2     | 2.232  | 2.641  |
| LY9      | 1.861  | 1.872  |
| FMOD     | 1.931  | 1.741  |
| PAX5     | 4.426  | 2.474  |
| IL31RA   | 1.912  | 2.738  |
| CIITA    | 1.993  | 1.507  |
| SLAMF6   | 2.396  | 1.819  |
| CRB1     | -1.966 | -2.370 |
| GPM6A    | 4.190  | -3.260 |
| TDRD12   | -3.447 | -3.631 |
| CHGA     | -2.423 | -3.842 |
| DGKI     | -2.238 | -2.024 |
| FLG      | -2.008 | -3.694 |
| SLC7A4   | -2.259 | -3.359 |
| NR2E1    | -2.607 | -4.229 |
| KRT5     | -2.490 | -4.193 |
| KLK7     | -3.606 | -6.078 |
| COL25A1  | -1.724 | -2.001 |
| PLA1A    | -1.987 | -2.589 |
| KCNN2    | -1.642 | -2.699 |
| SBSN     | -2.508 | -4.149 |
| KRT17    | -2.670 | -4.764 |
| RHCG     | -2.677 | -3.889 |
| S100A2   | -2.288 | -3.441 |
| BCAN     | -2.321 | -4.185 |

---

There is a high concordance of similarity between upregulated and downregulated genes between both groups.
